# Supplementary material for: A high throughput immuno-affinity mass spectrometry method for detection and quantitation of SARS-CoV-2 nucleoprotein in human saliva and its comparison with RT-PCR, RT-LAMP, and lateral flow rapid antigen test
Source: publisher site journal article supplement (doi:10.1515/cclm-2023-0243), 2024-01-22
Supplement: Supplementary file 1 [file j_cclm-2023-0243_suppl_001.docx]

**Supplementary data**

**Materials and reagents**

LC-MS

Water, acetonitrile and formic acid, all Optima LC-MS grade, were sourced from Fisher Chemical (Geel, Belgium). Phosphate buffered saline (PBS) tablets were purchased from Thermo Fisher (Rockford, IL, USA). 3- [(3-Cholamidopropyl)dimethylammonio]-1-propanesulfonate (CHAPS), trypsin from bovine pancreas and N-alpha-p-Tosyl-L-lysine chloromethyl ketone hydrochloride (TLCK) were obtained from Sigma-Aldrich (St. Louis, MO, USA). Proteotypic, surrogate peptides AYNVTQAFGR (AYN), ADETQALPQR (ADE), and DGIIWVATEGALNTPK (DGI) from the virus NCAP protein were synthesized by and acquired from PepScan (Lelystad, Netherlands). Stable isotope standard (SIS) peptides AYN(*) peptide (modified using 13C615N4 R), ADE [modified using 13C615N4 R], and DGI(*) peptide (modified using 13C615N2 K) were from New England Peptide (Gardner, MA, USA). Affinity purified anti-AYN and anti-DGI rabbit polyclonal antibody-conjugated magnetic beads, and the magnetic plate array were from SISCAPA Assay technologies Inc. (Washington, DC, USA and Victoria BC,Canada).

For peptide analysis, Quan Recovery 96-well plates, Total Recovery LCMS vials, an ACQUITY UPLC I-Class PLUS system coupled to a Xevo TQ-XS Tandem Quadrupole (LC-MS/MS) and ACQUITY UPLC Peptide BEH C18 1.7 µm, 2.1 mm x 50 mm column from Waters Corporation (Milford, MA, USA or Wilmslow, UK) were used. Raw mass spectrometer data files are available on PeptideAtlas (identifier: PASS05850)

SISCAPA solutions, buffers, and magnetic immunoaffinity beads

SISCAPA antibodies were prepared by coupling the SIS peptides to keyhole limpet hemocyanin and the hapten-carrier complexes used to immunize rabbits with multiple injections over a 78 day period to allow affinity maturation and production of high affinity polyclonal antibodies. The anti-peptide antibodies were affinity-purified by binding and elution from agarose-coupled peptide adsorbents.

For peptide quantification, a SIS peptide solution was made (5 fmol/µL each of AYN(*), ADE(*), and DGI(*). Wash buffer (PBS/0.5 mM CHAPS), elution buffer (1% formic acid/0.5 mM CHAPS), denaturant solution (2% RapiGest, 5 fmol/µL SIS peptides, 200 mM ammonium bicarbonate), digestion solution (6 µg/µL trypsin, 200 mM ammonium bicarbonate), and stop solution (60 mM TLCK, 200 mM ammonium bicarbonate) were freshly prepared.

Each batch of the affinity-purified polyclonal antibodies was conjugated to protein G magnetic beads using dimethyl pimelimidate at varying concentrations (ranging from 0.1 – 0.5 µg/µL) based on their performance in the SISCAPA workflow. Suspensions of antibody-beads (anti-AYN, anti-DGI and anti-ADE antibodies conjugated to magnetic beads and stored in PBS/ 0.03% CHAPS) were freshly prepared for each use.

RAT

The SARS-CoV-2 Antigen Rapid Qualitative Test kit was purchased from Innova Medical Group (Pasadena, CA, USA). All other materials were as described for the mass spectrometry materials.

RT-PCR and RT-LAMP

The MagMAX Viral/Pathogen Nucleic Acid Isolation Kit was used on a KingFisher Flex Purification system (Thermofisher, Loughborough, UK). The RealStar® SARS-CoV-2 RT-PCR kit (Altona Diagnostics, Hamburg, Germany) was used for cDNA isolation for RT-PCR. For RT-LAMP, WarmStart® RT-LAMP Master Mix, fluorescent dye, thermolabile UDG were sourced from New England Biolabs (Hitchin, UK). RT-LAMP primers were sourced from Merck (Southampton, UK). A StepOnePlus thermal cycler used throughout was from Thermo Fisher (Loughborough, UK).

**Method development and optimisation**

The MassLynx-Skyline Interface (MSI) tool was used to automate the development and optimisation of the MS method for AYN and DGI peptides and their stable isotope-labelled forms. Briefly, a mixed peptide standard (500 fmol/µL) was injected on the LC-MS system whereby MSI firstly identified peptide retention times. Through successive injections, MSI selected the top 3-5 transitions based on their raw peak intensities and then optimised collision energies. The generated MRM method was then automatically imported into MassLynx operating software for use. A graphical outline of the process is shown in the **Supplemental Figure 1.** MRM windows were, if needed, manually extended to accommodate any peak shifts during the optimisation process; points-per-peak were increased to 13 for each MRM experiment.

For peptide immunoaffinity enrichment optimisation, 5 samples tested during initial pilot screening were processed as above but with 10 µL of each anti-peptide antibody magnetic bead immunadsorbent. From these, 3 LC-MS positive samples were re-extracted with 20 µL of each antibody adsorbent to investigate binding characteristics in real samples. Total peak areas were compared between both sets to test binding site saturation.

Optimisation of enrichment protocol and establishing repeatability and the calibration model

Different sample volumes (100, 200, 500 µL) and elution volumes (20, 45 µL) were tested for optimal recovery of NCAP from spiked matrix. Given sample volume constraints, 100 µL neat saliva were used despite 200 µL providing more intense signal. A high elution volume was favoured (data not shown). Repeatability was tested by calculating the coefficient of variation (CV) of LC-MS response for each peptide over 3 freshly prepared calibration curves analysed on separate days (*i.e.,* CV calculated per level, then averaged per peptide; N=24 calibrator samples total). Across the peptides, response CV was low (all peptides < 0.16 CV), indicating low dispersion, hence good reproducibility. Calibration models were tested in matrix spiked with peptides (AYN, ADE, DGI) across 0.01 to 25 fmol/µL. Quadratic models were tested at each none, 1/x, and 1/x2 weightings (**Supplemental Figure 2**). The model with the highest R2 was applied to the whole dataset for peptide quantification.

Adaption from the Operation Moonshot SISCAPA nasopharyngeal method

The saliva method was initially created alongside the nasopharyngeal swab SISCAPA-LC-MS method developed in Operation Moonshot, which was then optimised and published on in early 2023 [24]. Hence, there is some deviation in the mass spectrometry conditions used for the saliva assay (*e.g.,* different collision energies in the monitored transitions) as this work was done previous (early 2021) to the final optimised parameters. The saliva SISCPA-LC-MS sample preparation method was developed in part by the phase 1 laboratories of Operation Moonshot, similarly to that process described by Hällqvist *et al.,* (2023) [24]. Therefore, the saliva assay was developed independently from the nasopharyngeal swab method – this development is described above.

**Supplementary table legends**

**Supplemental Table I**. MRM characteristics of SARS-CoV-2 nucleoprotein proteotypic peptides and their stable isotope labelled analogues (*).

**Supplementary figure legends**

**Supplemental Figure 1.** MassLynx Skyline Interface (MSI) optimisation process for rapid MRM based LC-MS method generation. Initial Skyline outputs that provide theoretical methods for all possible transitions were refined and the collision energies were optimised for each transition. Finally, a small set of transitions were specifically optimised for each peptide. Improvements to signal were between 1.25– 4-fold for the DGI and AYN peptides both doubly (++) and triply (+++) charged) peptides are shown.

**Supplemental Figure 2.** Calibration models for ADE (A), AYN (B), and DGI (C) peptides under quadratic equations with weightings (none, 1/*x*, and 1/*x*2). Lowest detectable calibrator was 0.01, 0.1, and 1 fmol/µL for ADE, AYN, and DGI, respectively.

**Supplemental Figure 3.** Regression analysis of RT-LAMP against RT-PCR for the detection of SARS-CoV-2 RNA in saliva.
